# Supplementary material
Source: PubMed Central journal article supplement (PMC1636844)

### Strong stop product

■ V79-4  
■ 67-1

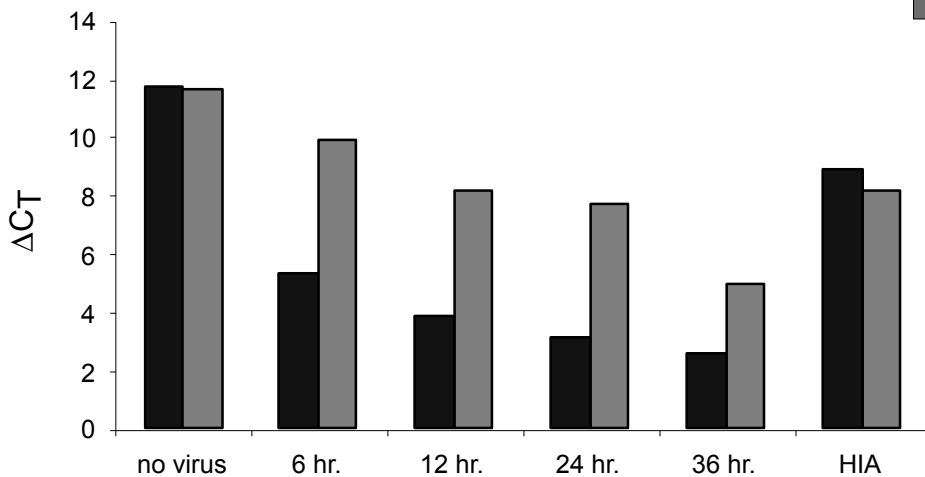

### 1st jump product

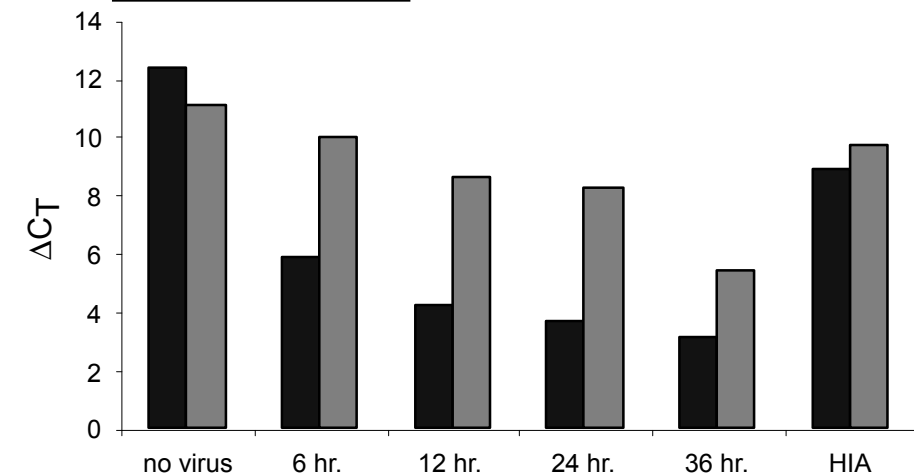

### Full product

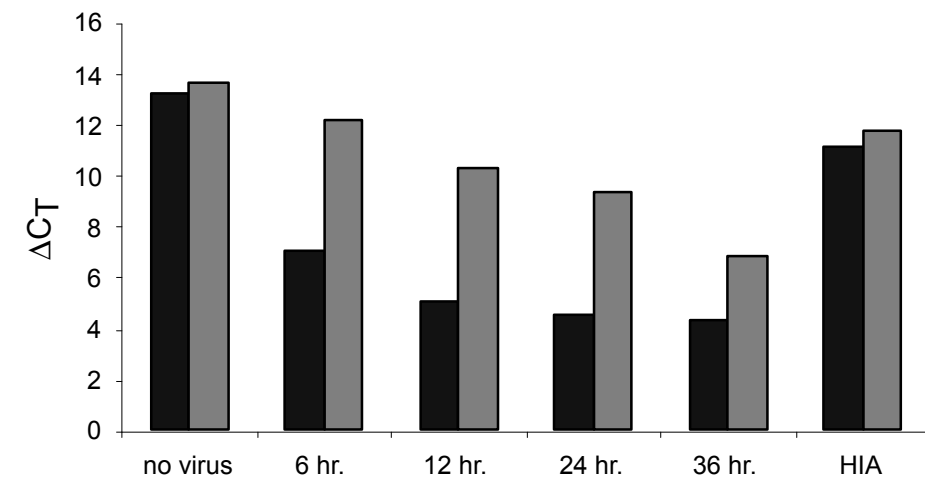

Supplement: pnas_0602674103_1.pdf [file pnas_0602674103_1.pdf]
